# Supplementary material for: Cinc veus per a una OCB en marxa
Source: Hindawi journal article supplement (doi:10.1155/2013/909613), 2012-01-01

## SUPPLEMENTARY TABLES AND FIGURE LEGENDS

**Supplementary Table 1. Composition of Osmolite**

(Abbott Nutrition, Australia Pty Ltd, NSW)

|                             | <b>Per 100 ml</b> |
|-----------------------------|-------------------|
| Energy (KJ)                 | 1061              |
| (KCal)                      | 252               |
| Protein (g)                 | 4.00              |
| Carbohydrate (g)            | 13.6              |
| of which sugar (g)          | 0.63              |
| Fat (g)                     | 3.40              |
| of which saturates (g)      | 0.84              |
| Fibre (g)                   | 0                 |
| <b>Vitamins</b>             |                   |
| Vitamin A (RE; µg)          | 108               |
| Vitamin D (µg)              | 0.73              |
| Vitamin E (αTE; mg)         | 2.14              |
| Vitamin C (mg)              | 10.0              |
| Thiamine (vitamin B1; mg)   | 0.16              |
| Riboflavin (vitamin B2; mg) | 0.18              |
| Niacin (NE; mg)             | 1.7               |
| Vitamin B6 (mg)             | 0.22              |
| Folacin (folic acid; µg)    | 23.0              |
| Vitamin B12 (µg)            | 0.34              |
| Biotin (µg)                 | 4.6               |
| Pantothenic acid (mg)       | 0.78              |
| Vitamin K (µg)              | 5.2               |
| <b>Minerals</b>             |                   |
| Sodium (mg)                 | 88.0              |
| Calcium (mg)                | 68.0              |
| Phosphorus (mg)             | 68.0              |
| Iron (mg)                   | 1.40              |
| Magnesium (mg)              | 20.0              |
| Zinc (mg)                   | 1.30              |
| Iodine (µg)                 | 11.0              |
| Potassium (mg)              | 148               |
| Chloride (mg)               | 136               |
| Copper (µg)                 | 170               |
| Manganese (mg)              | 0.38              |
| Selenium (µg)               | 6                 |
| Chromium (µg)               | 6.5               |
| Molybdenum (µg)             | 12.0              |
| Choline (mg)                | 56.0              |
| • Osmolarity 244 mOsm/L     |                   |

**Supplementary Table 2. Chemical composition of the standard mouse chow diet  
(Lab Diet 5001)**

| <b>Nutrients</b>                                |             |
|-------------------------------------------------|-------------|
| <b>Proteins, %</b>                              | <b>23.9</b> |
| Arginine, %                                     | 1.41        |
| Cystine, %                                      | 0.31        |
| Glycine, %                                      | 1.21        |
| Histidine, %                                    | 0.57        |
| Isoleucine, %                                   | 1.14        |
| Leucine, %                                      | 1.83        |
| Lysine, %                                       | 1.41        |
| Methionine, %                                   | 0.67        |
| Phenylalanine, %                                | 1.04        |
| Tyrosine, %                                     | 0.71        |
| Threonine, %                                    | 0.91        |
| Tryptophan, %                                   | 0.29        |
| Valine, %                                       | 1.17        |
| Serine, %                                       | 1.19        |
| Aspartic Acid, %                                | 2.81        |
| Glutamic Acid, %                                | 4.37        |
| Alanine, %                                      | 1.43        |
| Proline, %                                      | 1.49        |
| Taurine, %                                      | 0.02        |
| <b>Fat (ether extract), %</b>                   | <b>5.00</b> |
| <b>Fat (acid hydrolysis), %</b>                 | <b>5.70</b> |
| Cholesterol, ppm                                | 200         |
| Linoleic Acid, %                                | 1.22        |
| Linolenic Acid, %                               | 0.10        |
| Arachidonic Acid, %                             | <0.01       |
| Omega-3 Fatty Acids, %                          | 0.19        |
| Total Saturated Fatty Acids, %                  | 1.56        |
| Total Monounsaturated Fatty Acids, %            | 1.60        |
| <b>Fiber (Crude), %</b>                         | <b>5.10</b> |
| Neutral Detergent Fiber, %                      | 15.6        |
| Acid Detergent Fiber, %                         | 6.70        |
| <b>Nitrogen-Free Extract (by difference), %</b> | <b>48.7</b> |
| Starch, %                                       | 31.9        |
| Glucose, %                                      | 0.22        |
| Fructose, %                                     | 0.30        |
| Sucrose, %                                      | 3.70        |
| Lactose, %                                      | 2.01        |
| <b>Total digestible nutrients, %</b>            | <b>76.0</b> |
| <b>Gross Energy, kcal/g</b>                     | <b>4.07</b> |
| <b>Physiological Fuel Value, kcal/g</b>         | <b>3.36</b> |
| <b>Metabolizable Energy, kcal/g</b>             | <b>3.02</b> |
| <b>Minerals</b>                                 |             |
| <b>Ash, %</b>                                   | <b>7.00</b> |
| Calcium, %                                      | 0.95        |

|                               |         |
|-------------------------------|---------|
| Phosphorus, %                 | 0.66    |
| Phosphorus (non-phytate), %   | 0.39    |
| Potassium, %                  | 1.18    |
| Magnesium, %                  | 0.21    |
| Sulfur, %                     | 0.36    |
| Sodium, %                     | 0.40    |
| Choline, %                    | 0.67    |
| Fluorine, ppm                 | 16.00   |
| Iron, ppm                     | 270     |
| Zinc, ppm                     | 79.00   |
| Manganese, ppm                | 70.00   |
| Copper, ppm                   | 13.00   |
| Cobalt, ppm                   | 0.90    |
| Iodine, ppm                   | 1.00    |
| Chromium, ppm                 | 1.20    |
| Selenium, ppm                 | 0.30    |
| <b>Vitamins</b>               |         |
| Carotene, ppm                 | 2.30    |
| Vitamin K (as menadione), ppm | 1.30    |
| Thiamine Hydrochloride, ppm   | 16.00   |
| Riboflavin, ppm               | 4.50    |
| Niacin, ppm                   | 120.00  |
| Pantothenic Acid, ppm         | 24.00   |
| Choline Chloride, ppm         | 2250.00 |
| Folic Acid, ppm               | 7.10    |
| Pyridoxine, ppm               | 6.00    |
| Biotin, ppm                   | 0.60    |
| B <sub>12</sub> , mcg/kg      | 50.00   |
| Vitamin A, IU/g               | 15.00   |
| Vitamin D (added), IU/g       | 4.50    |
| Vitamin E, IU/g               | 42.00   |

- Oval pellet, 10 mm x 16 mm x 25 mm length

**Supplementary Table 3. Histological injury scoring system in IL-10<sup>-/-</sup> mice on a  
C57BL/6 background**

| <b>Histological injury scoring system</b>                              | <b>Score (0-15)*</b> |
|------------------------------------------------------------------------|----------------------|
| <b>Epithelial hyperplasia</b>                                          | <b>0-3</b>           |
| Normal                                                                 | 0                    |
| Mild                                                                   | 1                    |
| Moderate                                                               | 2                    |
| Pseudopolyps                                                           | 3                    |
| <b>Mononuclear infiltration</b>                                        | <b>0-4</b>           |
| None; Rare inflammatory cells in the lamina propria                    | 0                    |
| Minimal; very few numbers of mononuclear cells in the lamina propria   | 1                    |
| Moderate; increased numbers of mononuclear cells in the lamina propria | 2                    |
| Marked; confluence of mononuclear cells extending into sub-mucosa      | 3                    |
| Severe; trans-mural extension of the mononuclear cells infiltration    | 4                    |
| <b>Neutrophil infiltration</b>                                         | <b>0-4</b>           |
| None; Rare neutrophil cells in the lamina propria                      | 0                    |
| Minimal; very few numbers of neutrophil cells in the lamina propria    | 1                    |
| Moderate; increased numbers of neutrophil cells in the lamina propria  | 2                    |
| Marked; confluence of neutrophil cells extending into sub-mucosa       | 3                    |
| Severe; trans-mural extension of neutrophil cells infiltration         | 4                    |
| <b>Mucosal ulceration</b>                                              | <b>0-4</b>           |
| Normal                                                                 | 0                    |
| Surface inflammation                                                   | 1                    |
| Erosions                                                               | 2                    |
| Focal ulceration                                                       | 3                    |
| Multifocal or diffuse ulceration                                       | 4                    |

\*0-5: normal histological appearance; 6-8: mild histological changes; 9-12: moderate histological changes; 12< severe tissue damage

**Supplementary Table 4. Association of the average histological injury score with the presence of *H. troglontum* in colon specimens collected from IL-10<sup>-/-</sup> mice**

| Groups                | Mouse number | 16S rRNA | Average histological injury score* |
|-----------------------|--------------|----------|------------------------------------|
| Non-infected controls | week 2       | 25       | Negative                           |
|                       |              | 61       | Negative                           |
|                       | week 4       | 26       | Negative                           |
|                       |              | 62       | Negative                           |
| Infected controls     | week 2       | 1        | Negative                           |
|                       |              | 30       | Positive                           |
|                       |              | 47       | Positive                           |
|                       |              | 70       | Positive                           |
|                       | week 4       | 9        | Positive                           |
|                       |              | 19       | Negative                           |
|                       |              | 44       | Positive                           |
|                       |              | 42       | Positive                           |
| <sup>1</sup> HC       | week 2       | 4        | Positive                           |
|                       |              | 20       | Positive                           |
|                       |              | 71       | Positive                           |
|                       |              | 59       | Positive                           |
|                       | week 4       | 50       | Positive                           |
|                       |              | 13       | Positive                           |
|                       |              | 10       | Positive                           |
|                       |              | 16       | Positive                           |
| <sup>2</sup> EEN      | week 2       | 23       | Negative                           |
|                       |              | 2        | Negative                           |
|                       |              | 53       | Negative                           |
|                       |              | 48       | Negative                           |
|                       |              | 72       | Negative                           |
|                       | week 4       | 55       | Negative                           |
|                       |              | 66       | Negative                           |
|                       |              | 49       | Negative                           |
| <sup>3</sup> MNZ      | week 2       | 29       | Negative                           |
|                       |              | 5        | Negative                           |
|                       |              | 63       | Positive                           |
|                       |              | 64       | Negative                           |
|                       | week 4       | 28       | Negative                           |
|                       |              | 8        | Negative                           |
|                       |              | 35       | Negative                           |
|                       |              | 38       | Positive                           |
| EEN+MNZ               | week 2       | 27       | Negative                           |
|                       |              | 21       | Positive                           |
|                       |              | 37       | Negative                           |
|                       |              | 67       | Negative                           |
|                       | week 4       | 6        | Negative                           |
|                       |              | 3        | Positive                           |
|                       |              | 43       | Negative                           |
|                       |              | 58       | Negative                           |

<sup>1</sup>Hydrocortisone; <sup>2</sup>exclusive enteral nutrition; <sup>3</sup>metronidazole

**Supplementary Figure 1 legend:**

DNA was extracted from colon tissue, which had been stored in *RNAlater*®, and subjected to an *H. trogontum* 16S rRNA specific PCR. Samples displaying a single (888 bp fragment) band were considered PCR positive for *H. trogontum*.

Ladder [fibronectin (FN)-1 marker; Fisher Biotech]; lanes 1-4: non-infected controls; lanes 5-8: infected controls; lanes 9-12 HC; lanes 13-16: MNZ; lanes 17-20: EEN; lanes 21-24: EEN+MNZ

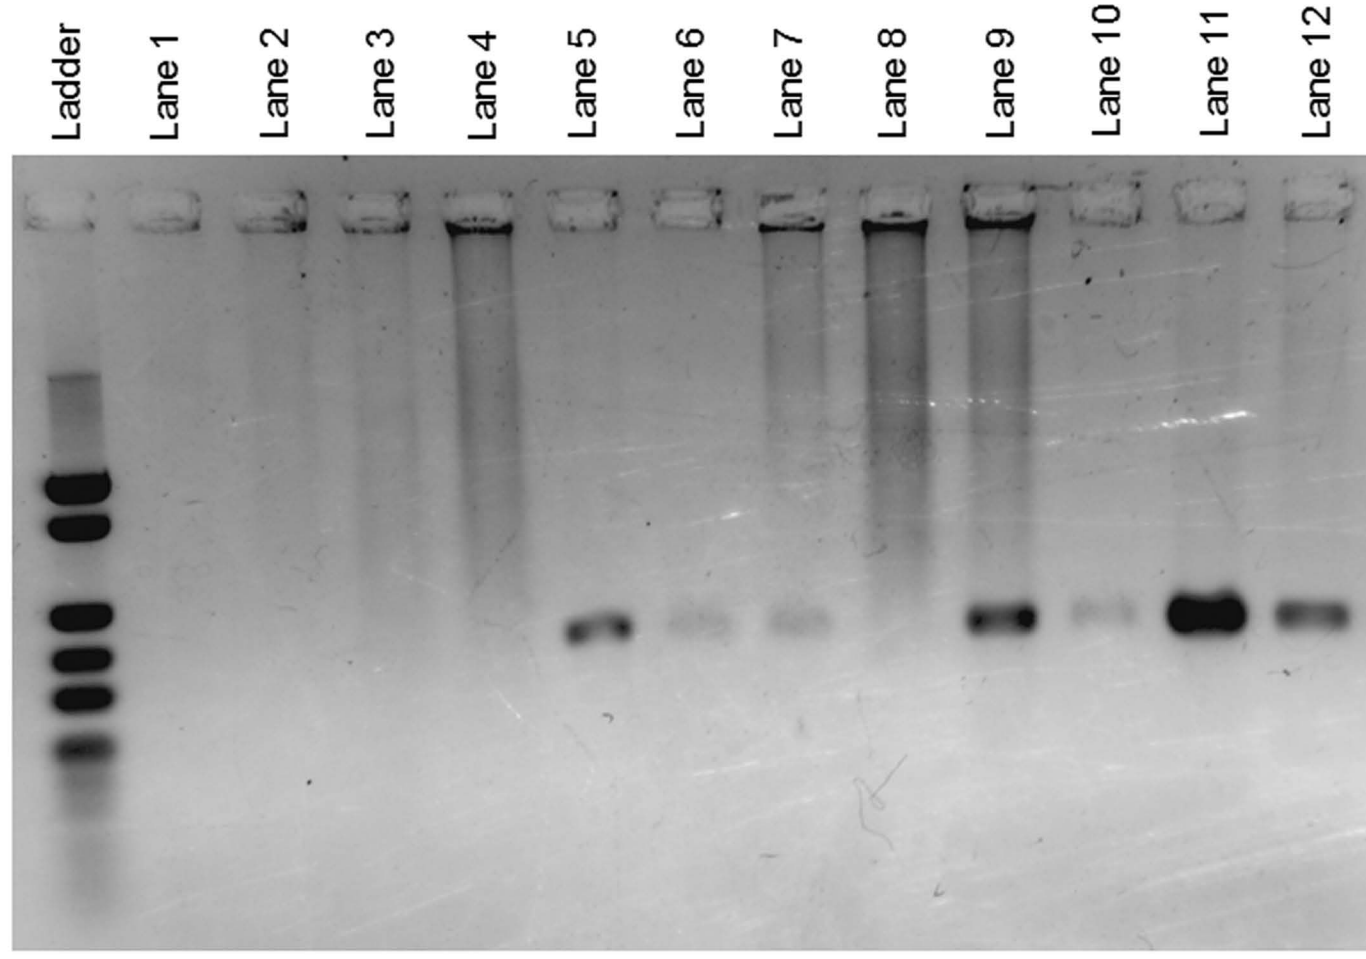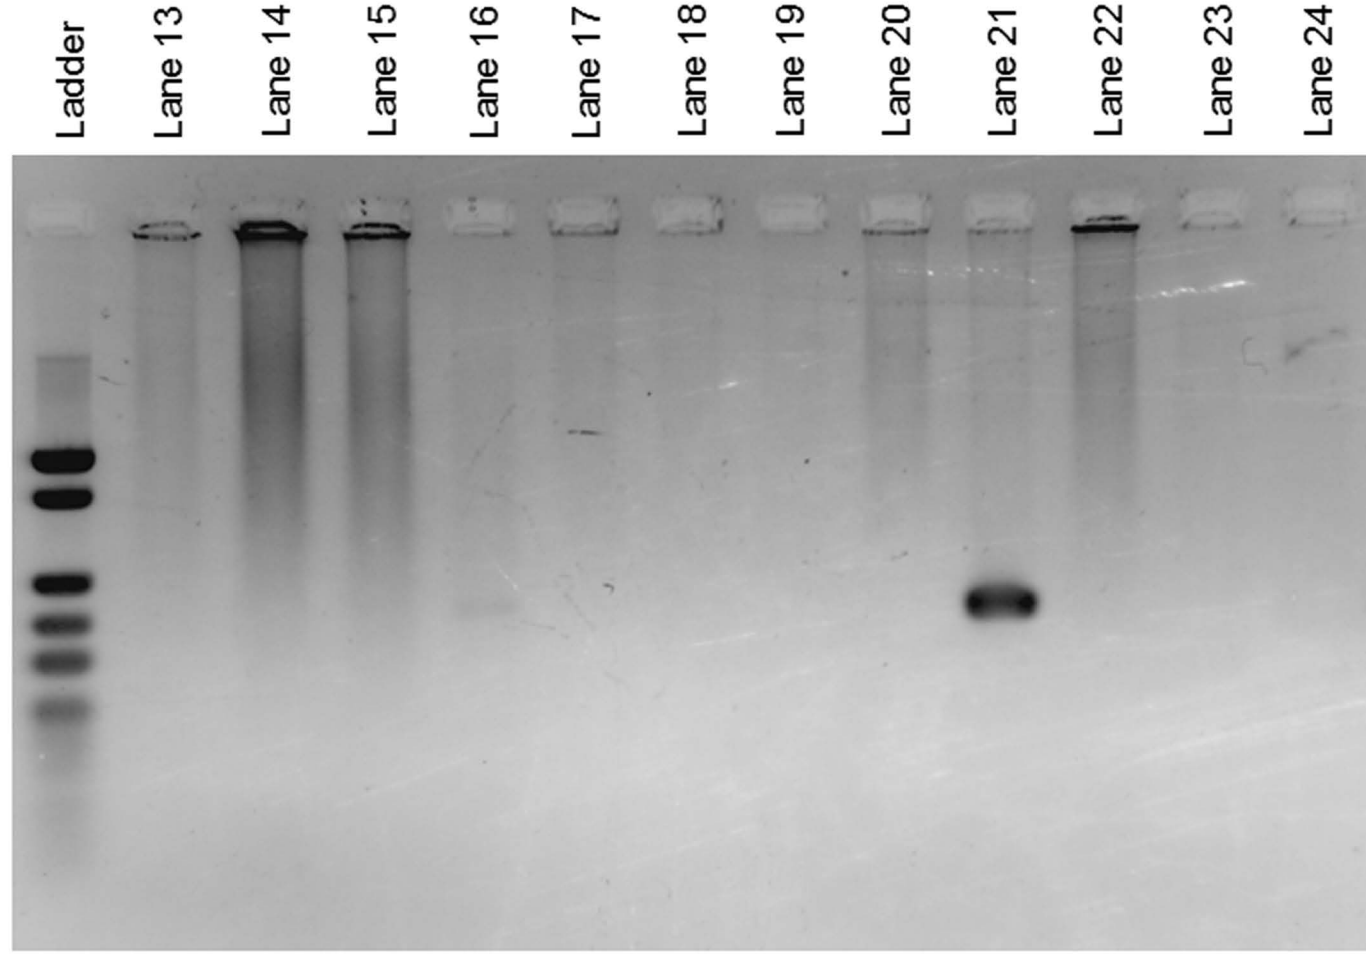

Supplement: f1 [file 909613.f1.pdf]
